# Supplementary material for: Effects of Medium Cut-Off Polyarylethersulfone and Polyvinylpyrrolidone Blend Membrane Dialyzers in Hemodialysis Patients: A Systematic Review and Meta-Analysis of Randomized Controlled Trials
Source: MDPI journal article supplement (doi:10.3390/membranes12050443), 2022-04-20

Supplementary Material

# Effects of Medium Cut-Off Polyarylethersulfone and Polyvinylpyrrolidone Blend Membrane Dialyzers in Hemodialysis Patients: A Systematic Review and Meta-Analysis of Randomized Controlled Trial

Yu-Hui Hung, Tai-Shuan Lai, Mohamed Belmouaz, Ya-Chun Tu, Chun-Fu Lai, Shuei-Liong Lin and Yung-Ming Chen

**Supplementary Table S1.** The MeSH search terms in the search strategy.

| #                    | PubMed search terms                                                                                                                                                                                                                                                                                                                                                                                                                                                                                                                                      |
|----------------------|----------------------------------------------------------------------------------------------------------------------------------------------------------------------------------------------------------------------------------------------------------------------------------------------------------------------------------------------------------------------------------------------------------------------------------------------------------------------------------------------------------------------------------------------------------|
| 1                    | Expanded hemodialysis                                                                                                                                                                                                                                                                                                                                                                                                                                                                                                                                    |
| 2                    | HDx                                                                                                                                                                                                                                                                                                                                                                                                                                                                                                                                                      |
| 3                    | medium cut-off membrane                                                                                                                                                                                                                                                                                                                                                                                                                                                                                                                                  |
| 4                    | medium cut-off polyvinylpyrrolidone blend membrane                                                                                                                                                                                                                                                                                                                                                                                                                                                                                                       |
| 5                    | MCO                                                                                                                                                                                                                                                                                                                                                                                                                                                                                                                                                      |
| 6                    | high retention onset membrane                                                                                                                                                                                                                                                                                                                                                                                                                                                                                                                            |
| 7                    | #1 OR #2 OR #3 OR #4 OR #5 OR #6                                                                                                                                                                                                                                                                                                                                                                                                                                                                                                                         |
| 8                    | beta2-microglobulin                                                                                                                                                                                                                                                                                                                                                                                                                                                                                                                                      |
| 9                    | kappa free light chain                                                                                                                                                                                                                                                                                                                                                                                                                                                                                                                                   |
| 10                   | lambda free light chain                                                                                                                                                                                                                                                                                                                                                                                                                                                                                                                                  |
| 11                   | interleukin-6                                                                                                                                                                                                                                                                                                                                                                                                                                                                                                                                            |
| 12                   | albumin                                                                                                                                                                                                                                                                                                                                                                                                                                                                                                                                                  |
| 13                   | #8 OR #9 OR #10 OR #11 OR #12                                                                                                                                                                                                                                                                                                                                                                                                                                                                                                                            |
| 14                   | #7 AND 13                                                                                                                                                                                                                                                                                                                                                                                                                                                                                                                                                |
| #                    | EMBASE search terms                                                                                                                                                                                                                                                                                                                                                                                                                                                                                                                                      |
| 1                    | ('expanded hemodialysis' OR (expanded AND ('hemodialysis'/exp OR hemodialysis)) OR 'hdx'/exp OR hdx OR 'medium cut-off membrane' OR (('medium'/exp OR medium) AND 'cut off' AND ('membrane'/exp OR membrane)) OR 'medium cut-off polyvinylpyrrolidone blend membrane' OR (('medium'/exp OR medium) AND 'cut off' AND ('polyvinylpyrrolidone'/exp OR polyvinylpyrrolidone) AND blend AND ('membrane'/exp OR membrane)) OR mco OR 'high retention onset membrane' OR (high AND ('retention'/exp OR retention) AND onset AND ('membrane'/exp OR membrane))) |
| 2                    | ((('beta2 microglobulin' OR kappa) AND free AND light AND chain OR lambda) AND free AND light AND chain OR 'interleukin 6' OR albumin)                                                                                                                                                                                                                                                                                                                                                                                                                   |
| 3                    | #1 AND #2                                                                                                                                                                                                                                                                                                                                                                                                                                                                                                                                                |
| #                    | Cochrane central registers of controlled trial databases                                                                                                                                                                                                                                                                                                                                                                                                                                                                                                 |
| 1                    | (Expanded hemodialysis) OR (medium cut-off membrane) OR (high retention onset membrane) (Word variations have been searched)                                                                                                                                                                                                                                                                                                                                                                                                                             |
| 2                    | (beta2-microglobulin) OR (kappa free light chain) OR (lambda free light chain) OR (interleukin-6) OR (albumin)                                                                                                                                                                                                                                                                                                                                                                                                                                           |
|                      | #1 AND #2                                                                                                                                                                                                                                                                                                                                                                                                                                                                                                                                                |
|                      | ClinicalTrials.gov registry                                                                                                                                                                                                                                                                                                                                                                                                                                                                                                                              |
| Status               | All studies                                                                                                                                                                                                                                                                                                                                                                                                                                                                                                                                              |
| Condition or disease | End-stage-renal disease                                                                                                                                                                                                                                                                                                                                                                                                                                                                                                                                  |
| Other terms          | medium cut-off polyvinylpyrrolidone blend membrane, medium cut-off membrane, MCO, expanded hemodialysis, HDx, high retention onset membrane, HRO                                                                                                                                                                                                                                                                                                                                                                                                         |

**Supplementary Figure S1.** Funnel plot of beta2-microglobulin studies. Right limb missing was found in the funnel plot, suggesting a potential publication bias.

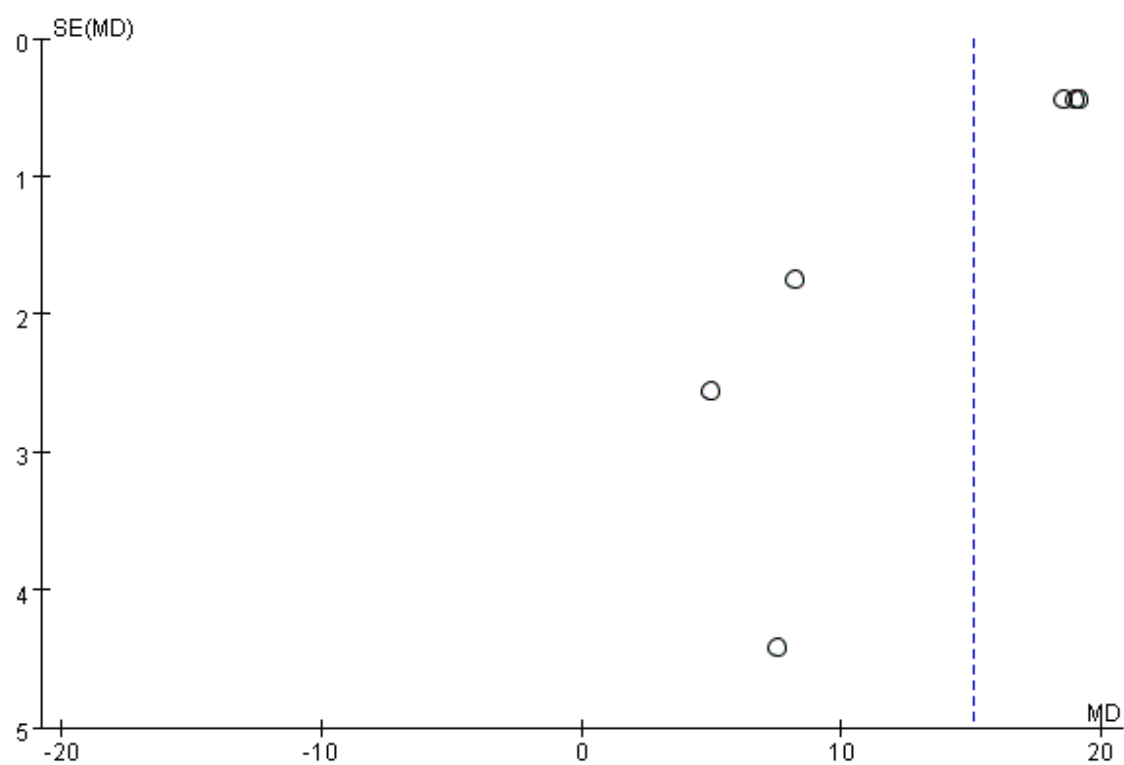

Supplement: s1 [file s1]
